# Supplementary material
Source: PubMed Central journal article supplement (PMC4000066)

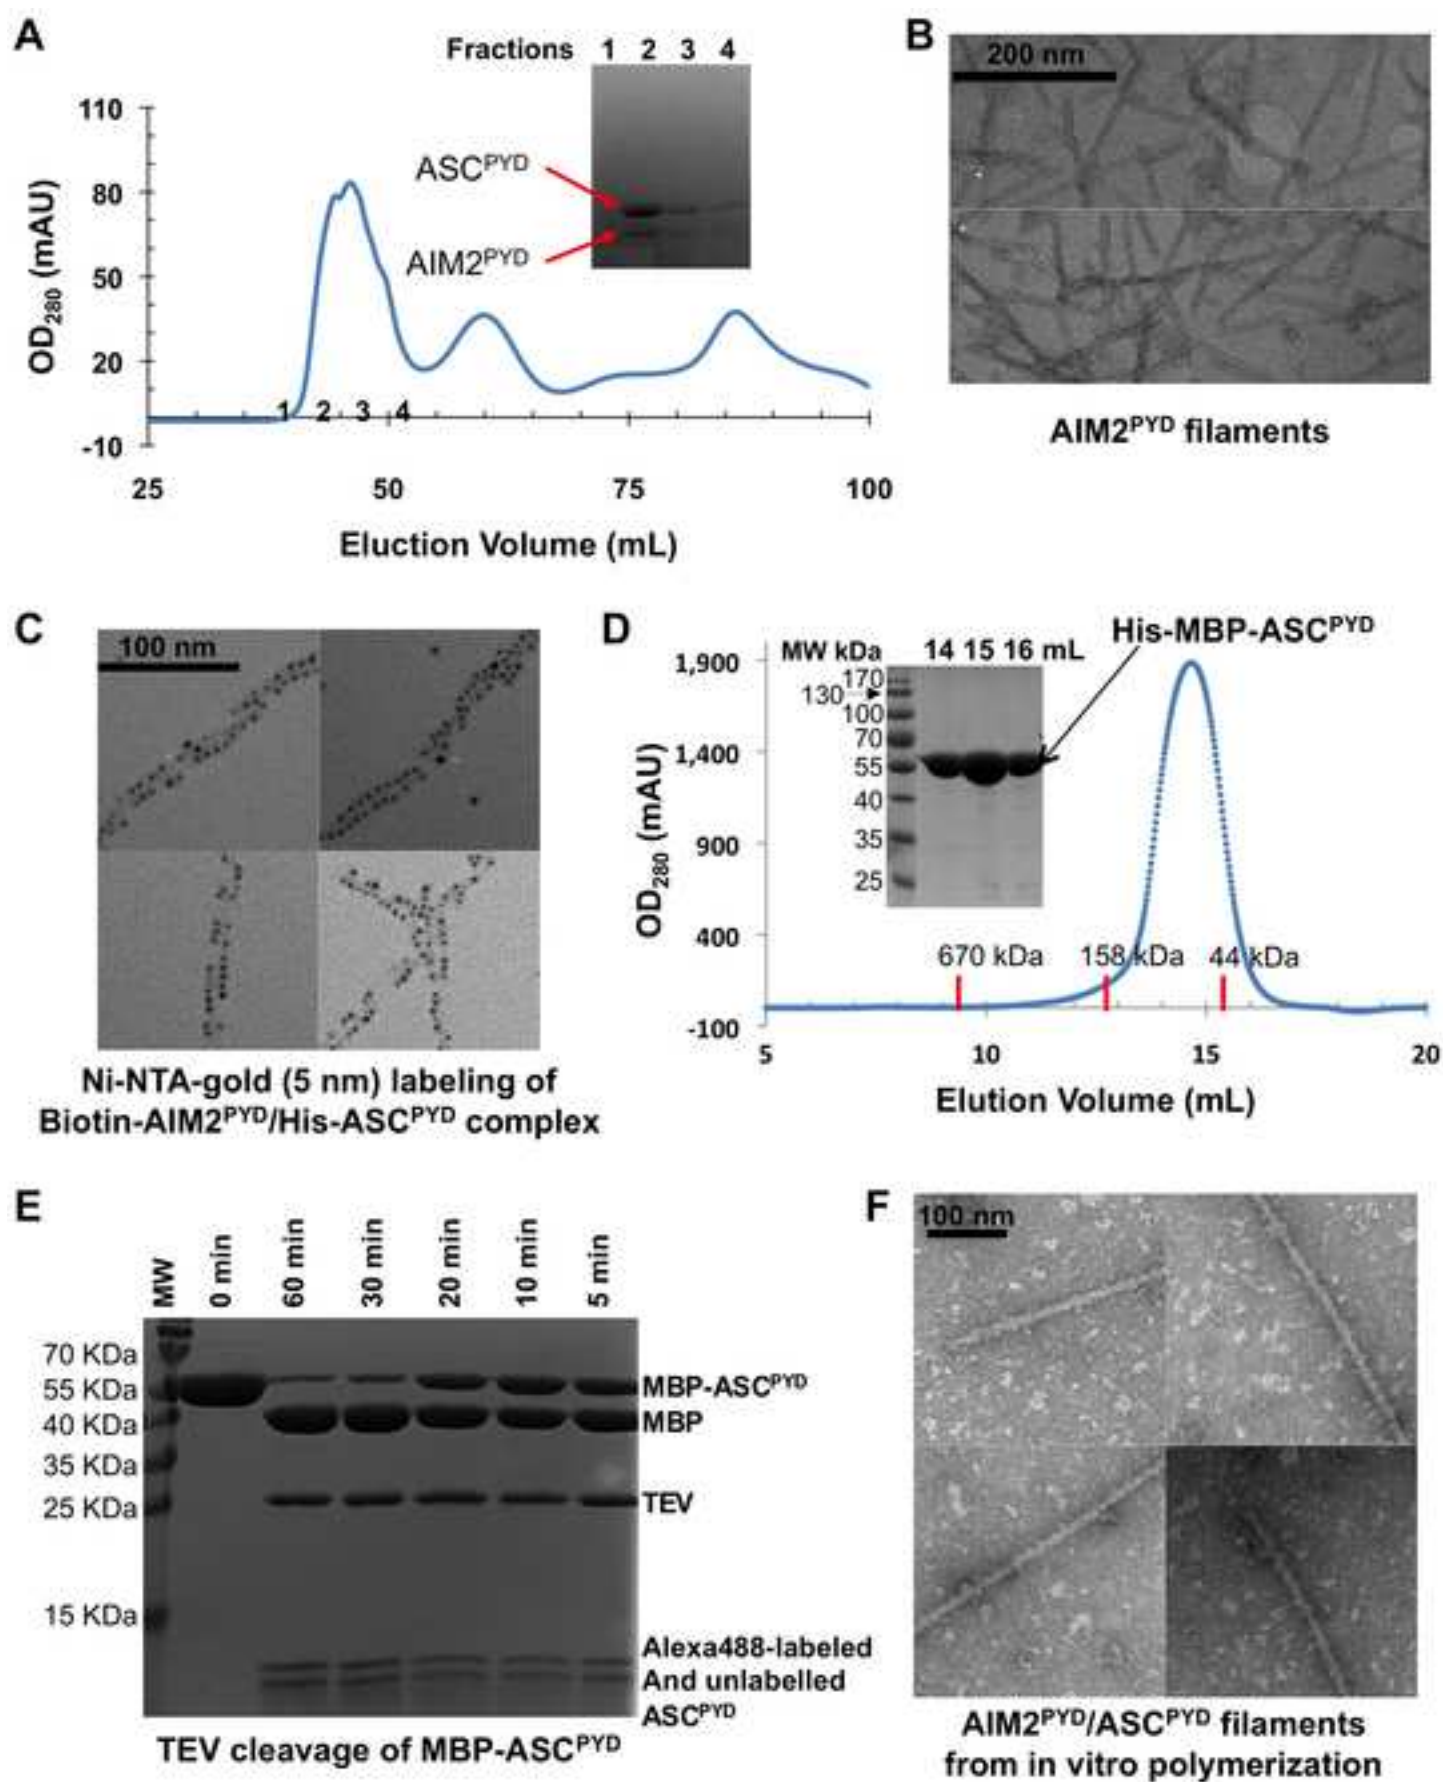

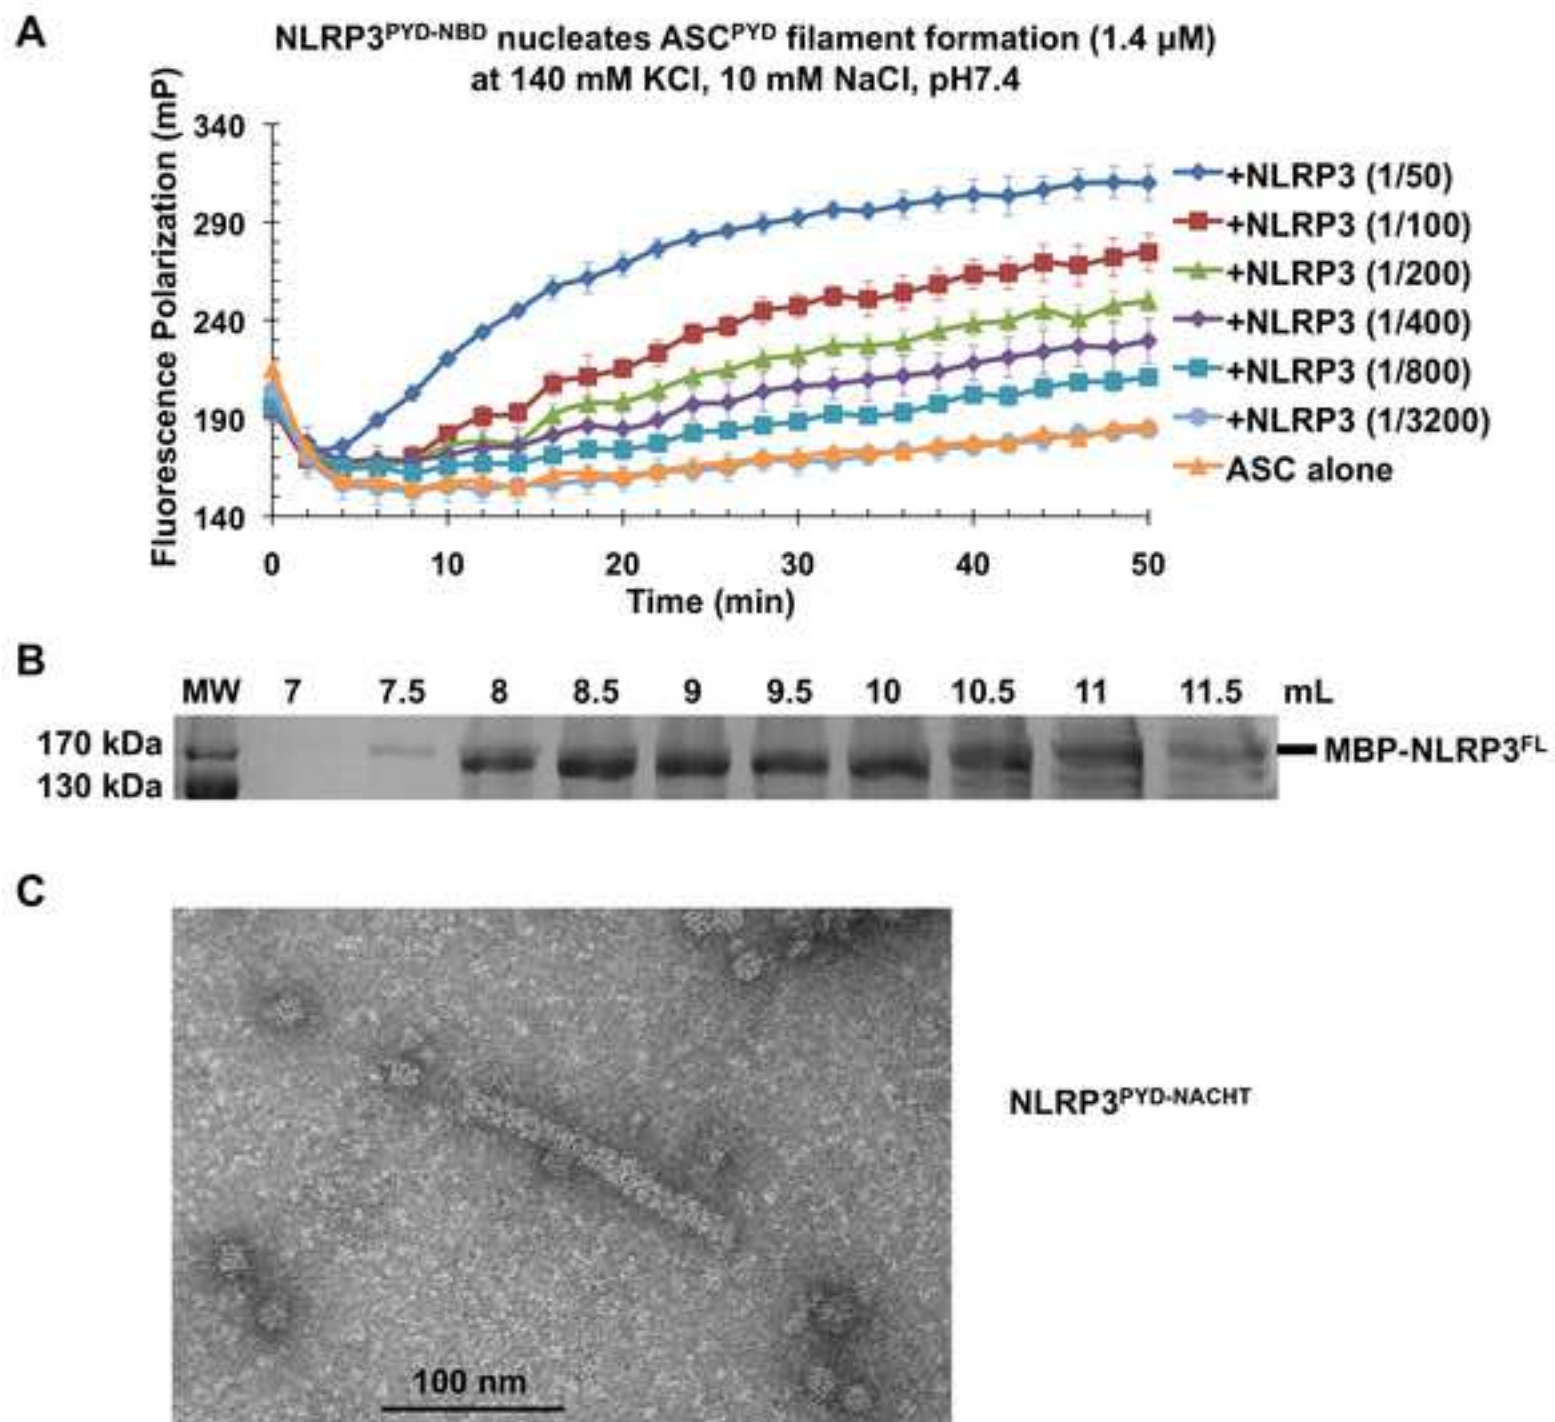

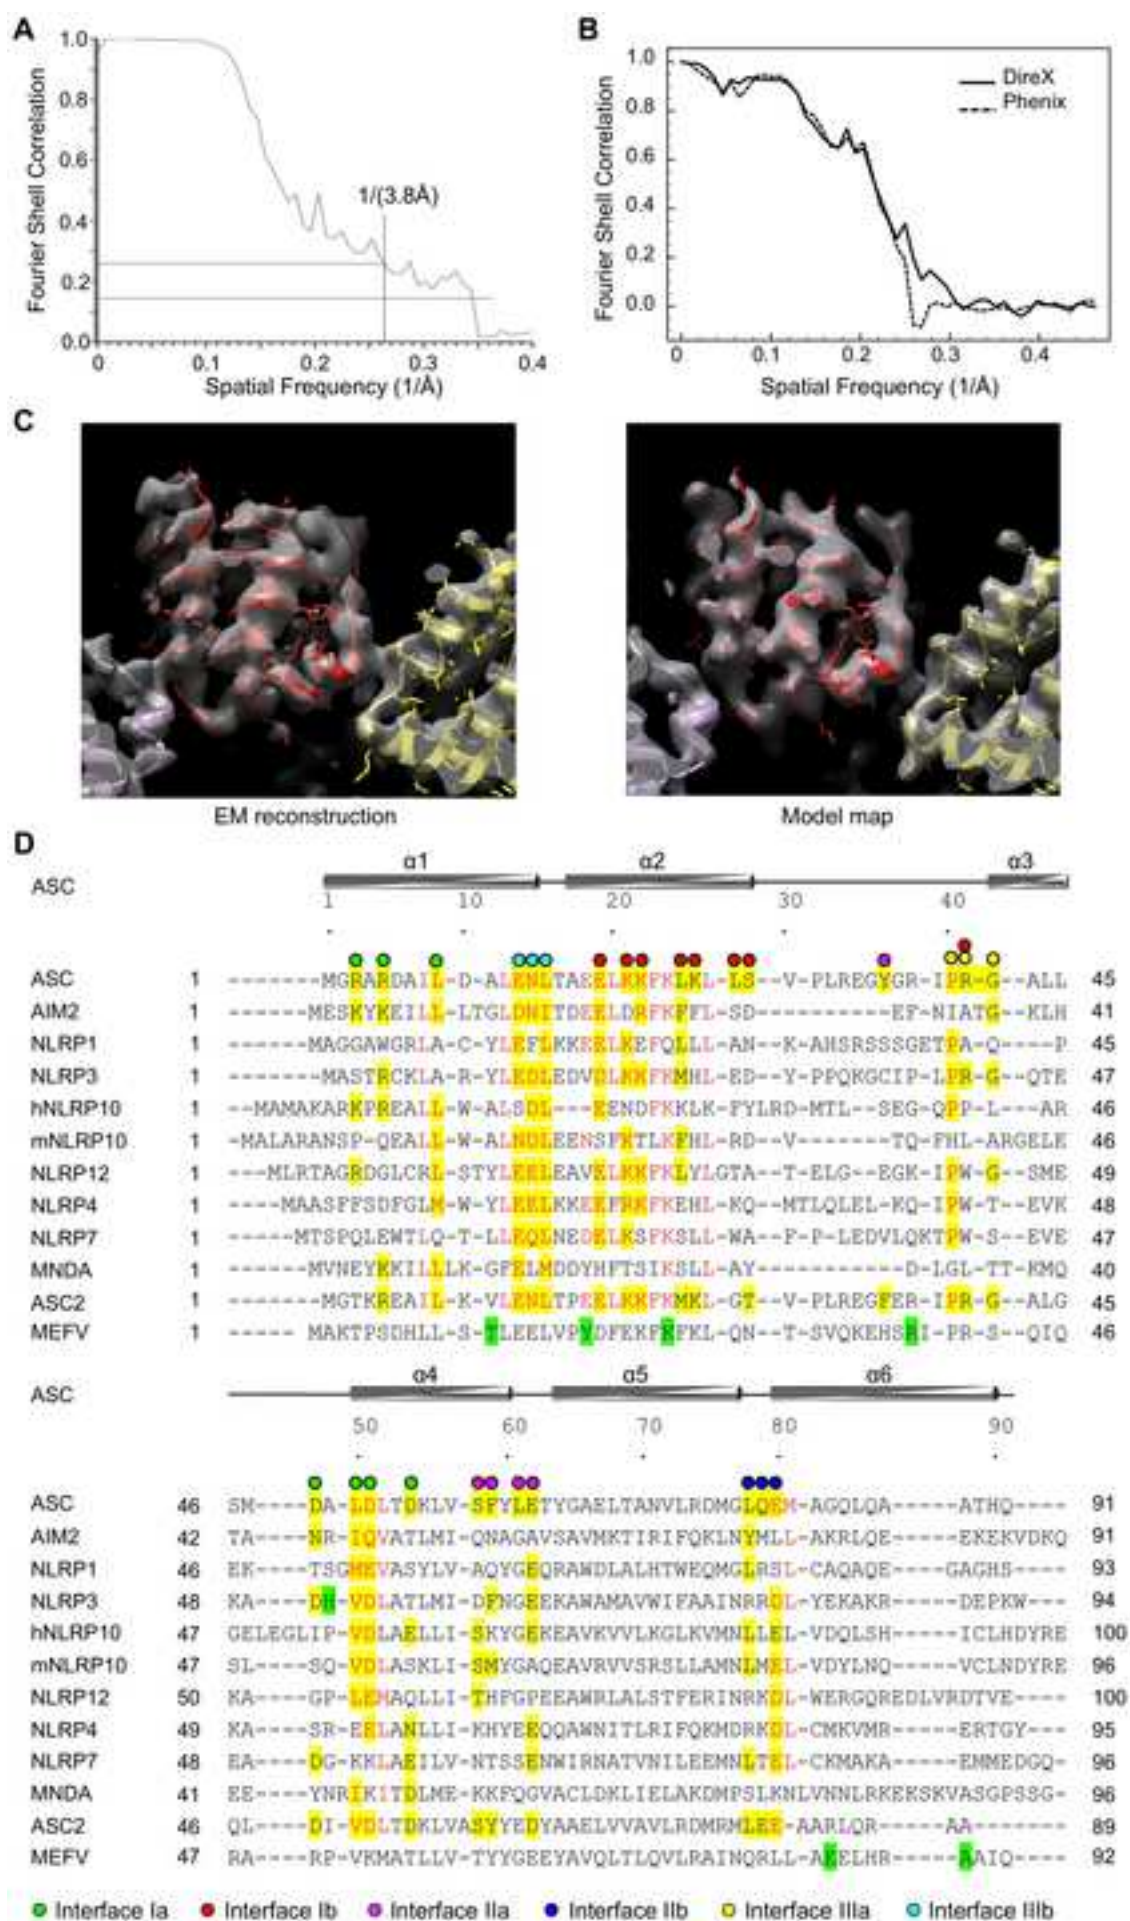



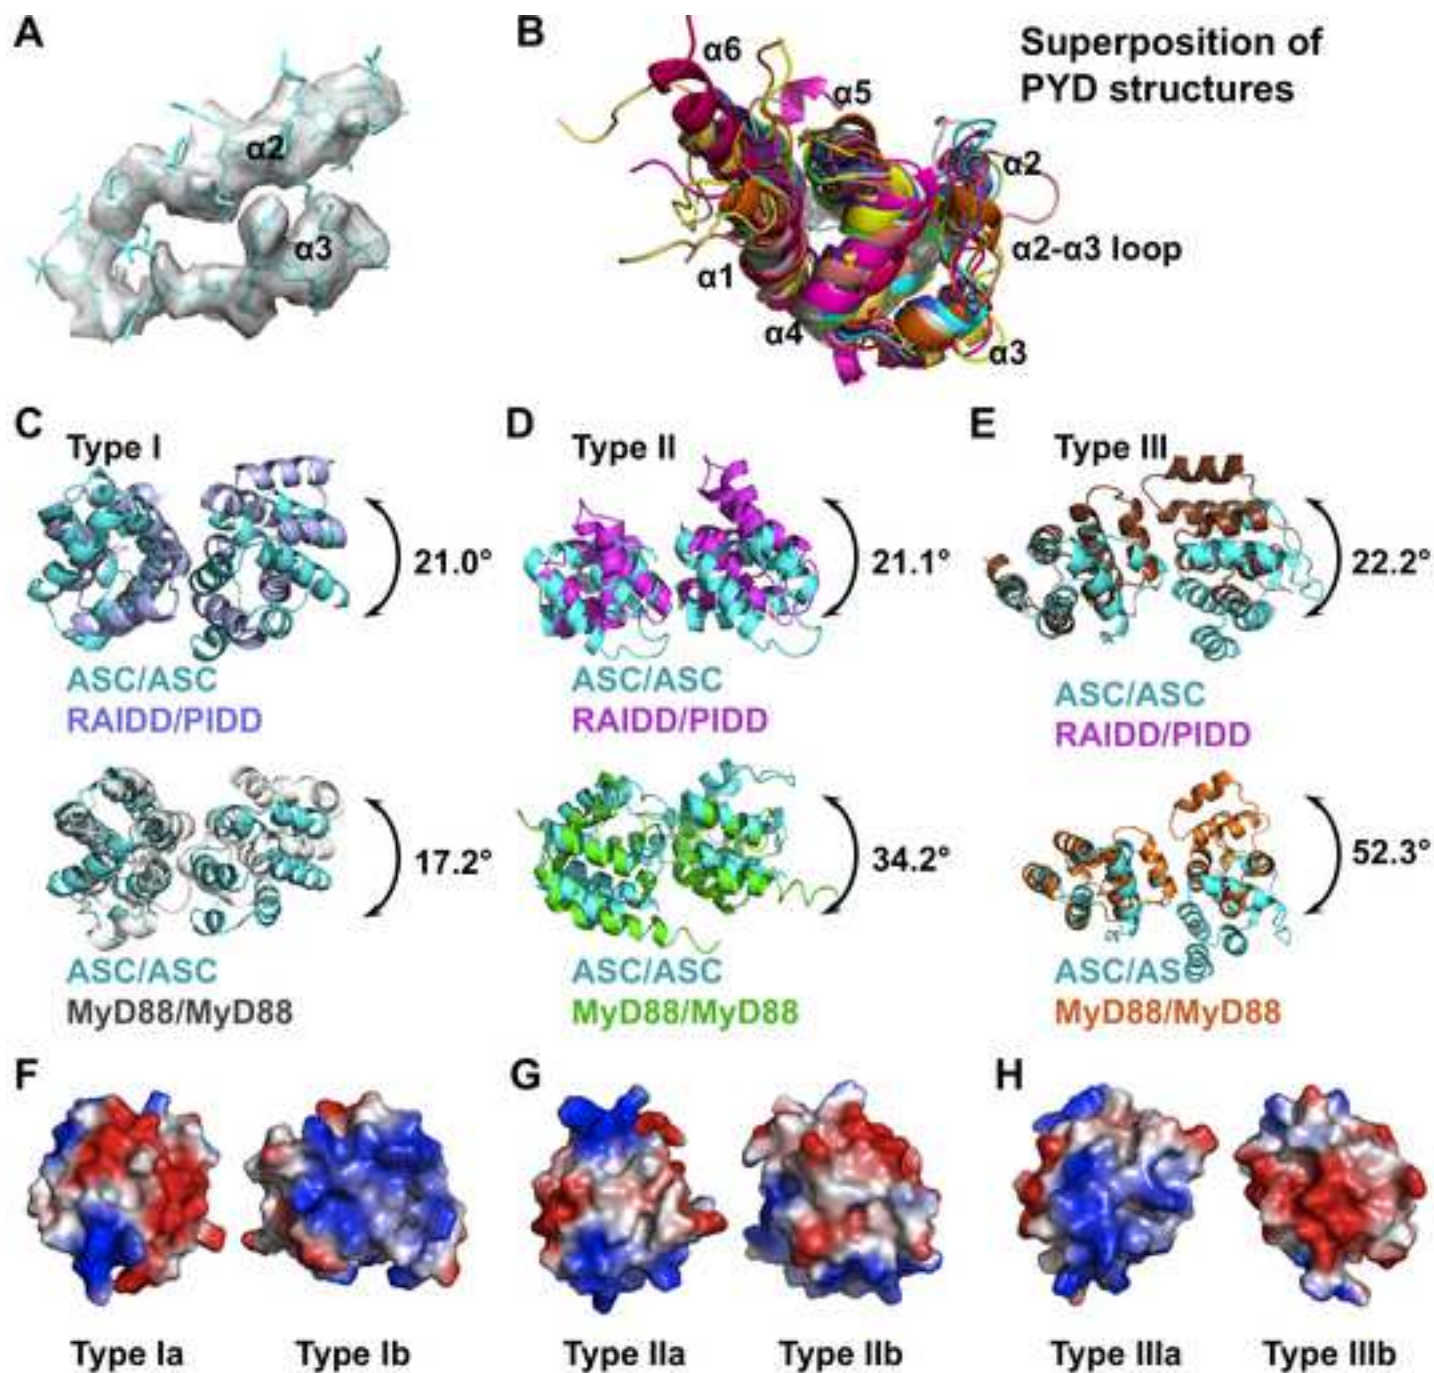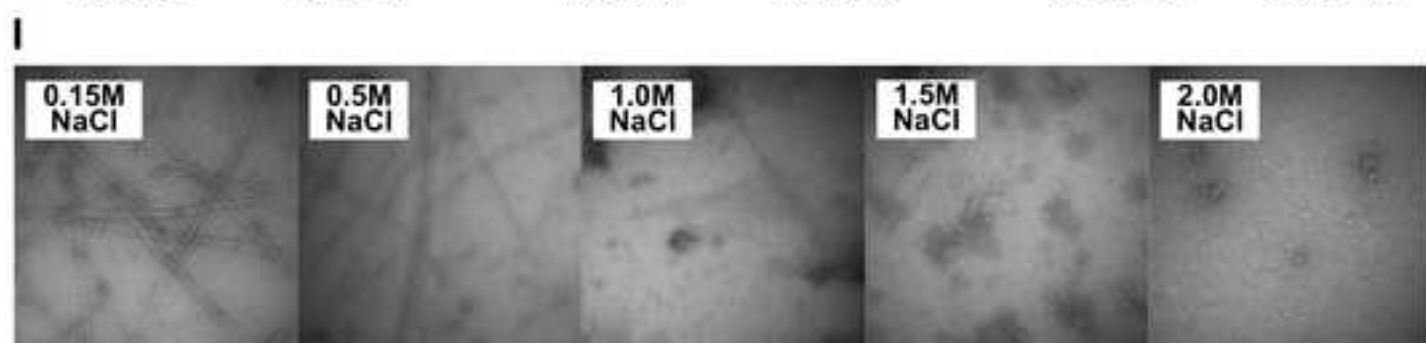

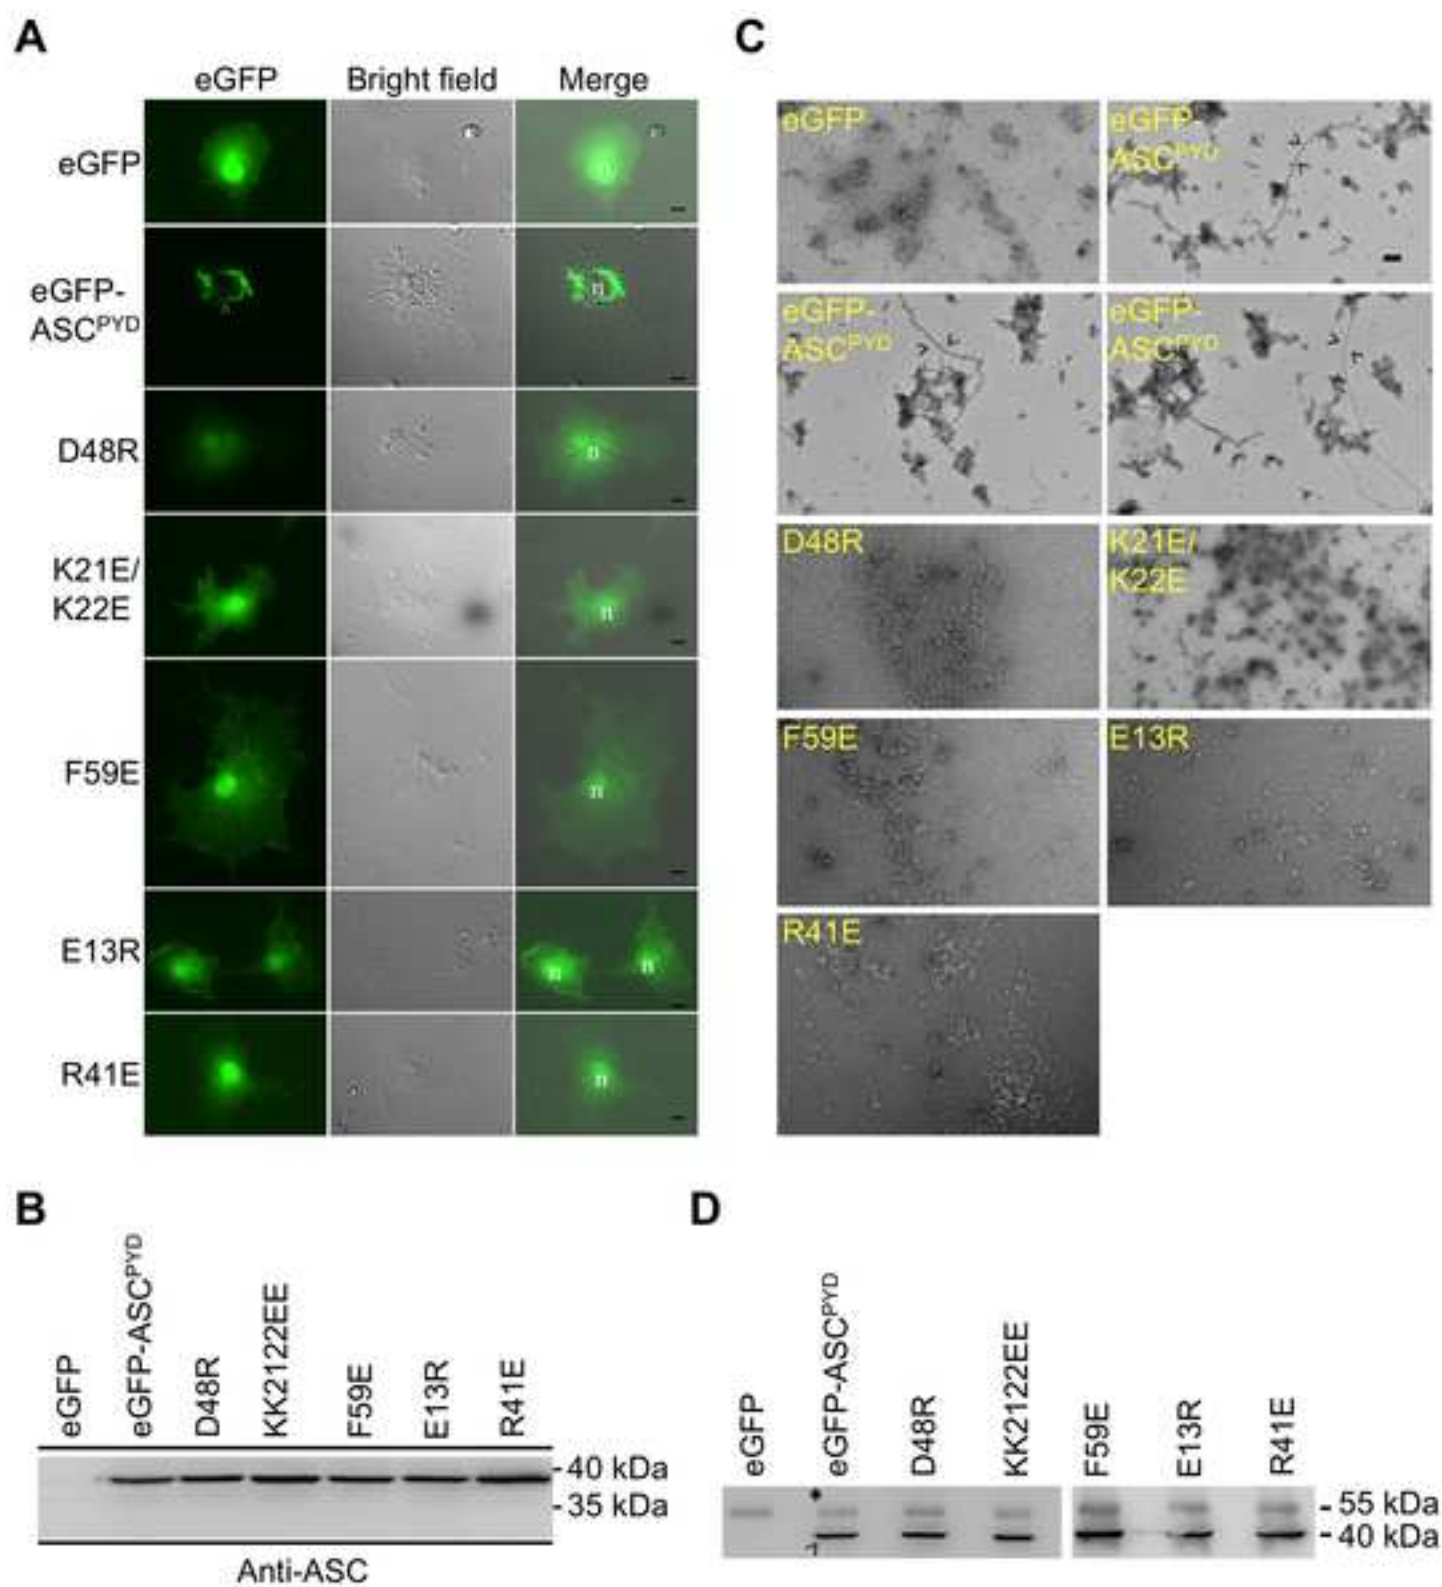

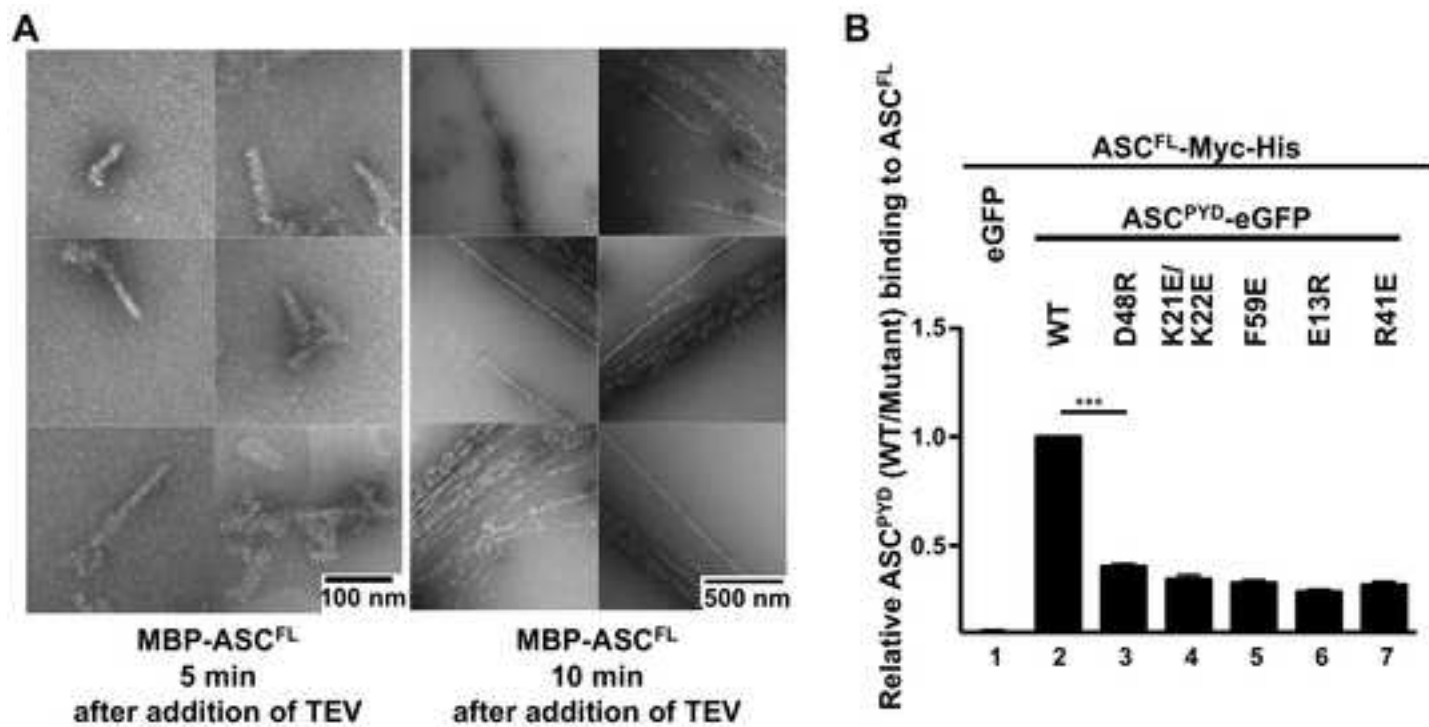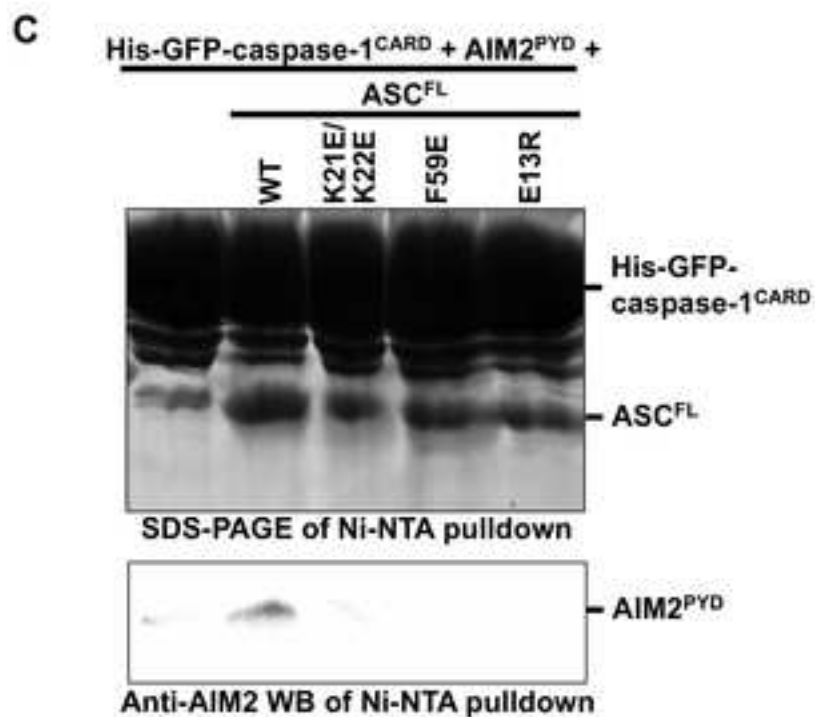



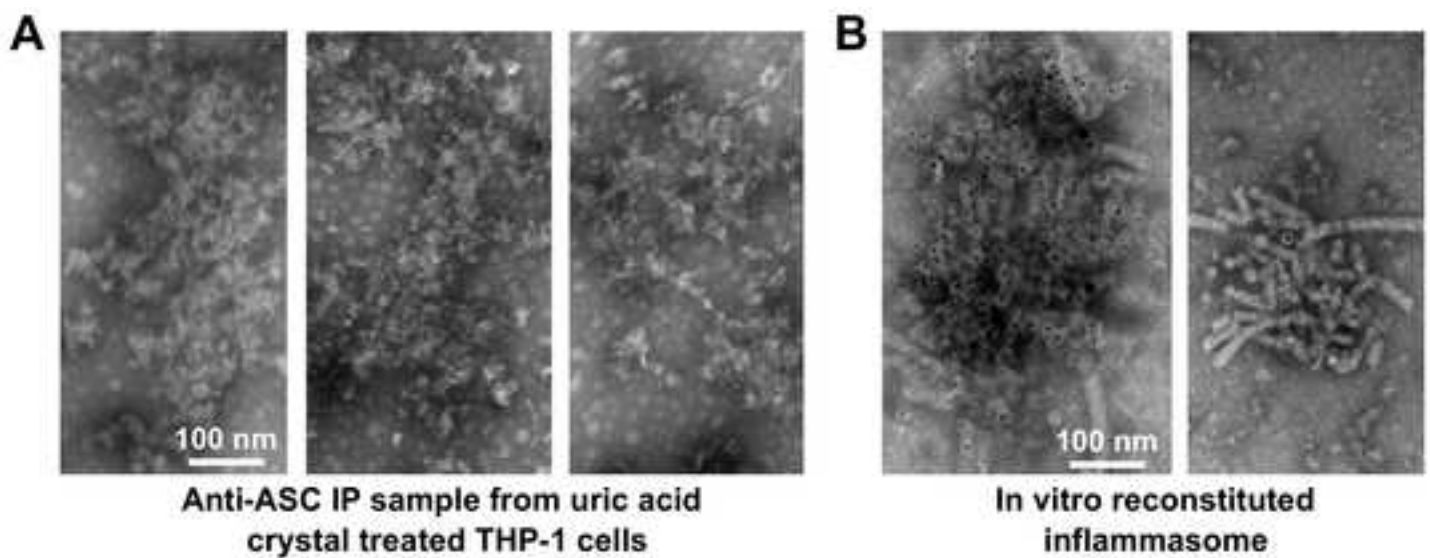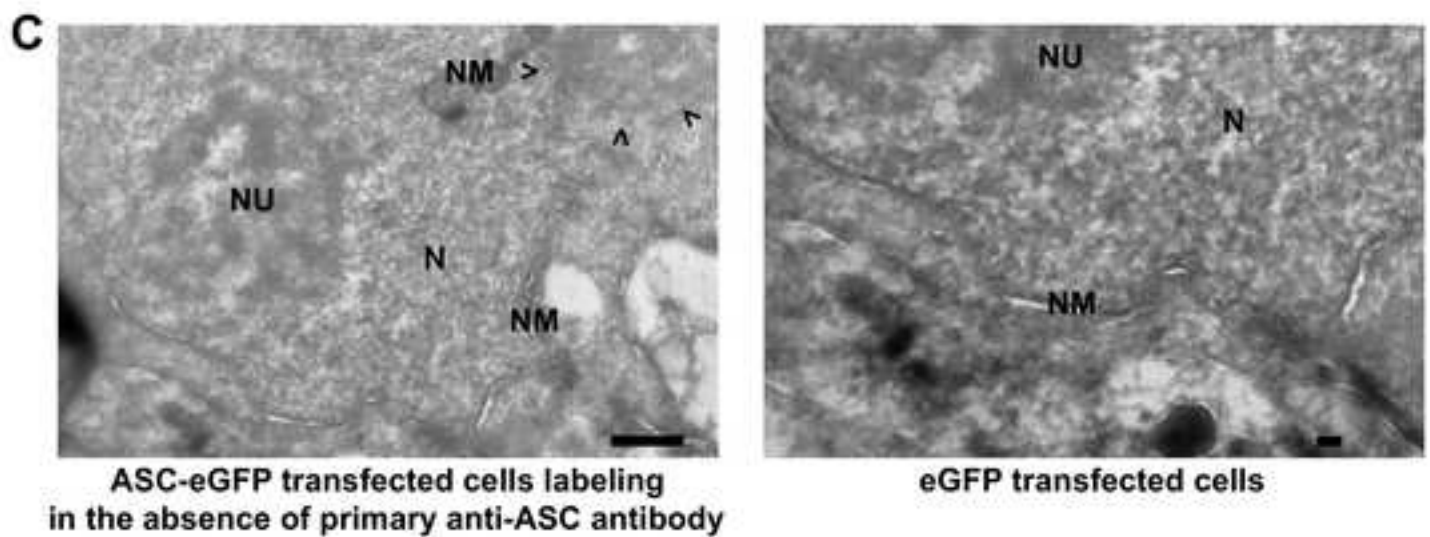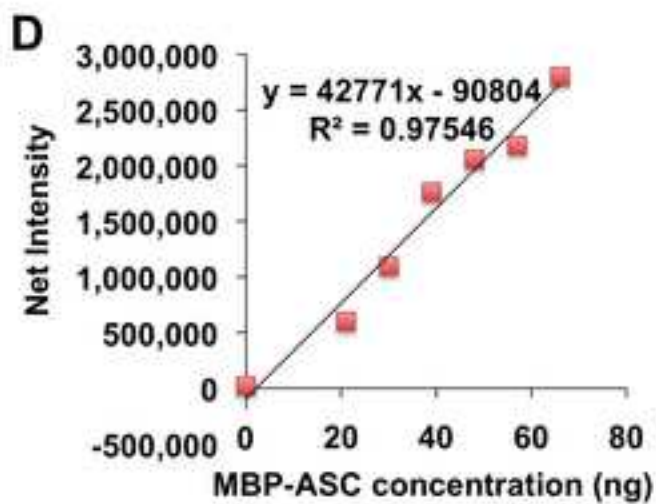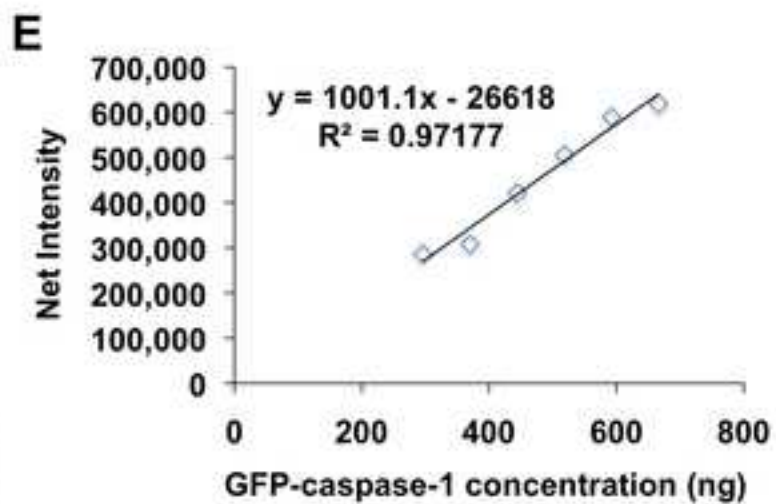

Supplement: NIHMS573276-supplement-03.pdf [file NIHMS573276-supplement-03.pdf]
